# Supplementary material for: Epidemiological Trends of Dengue Disease in Colombia (2000-2011): A Systematic Review
Source: PubMed Central journal article supplement (PMC4366106; doi:10.1371/journal.pntd.0003499), 2015-03-19
Supplement: pntd.0003499.s002.pdf [file pntd.0003499.s002.pdf]

**Table S1.** Databases searched for citations relating to dengue disease epidemiology in Colombia.

| <b>Database</b>                                                                                                                                                                                                                                                                                                                                                                                      | <b>Website</b>                                                                                                                                                                                                                                                                                                                                                                                                                                                                                                                                                                                                                                                                                                                                                                                                                                                                                                                                                                                                                                                                                                                    |
|------------------------------------------------------------------------------------------------------------------------------------------------------------------------------------------------------------------------------------------------------------------------------------------------------------------------------------------------------------------------------------------------------|-----------------------------------------------------------------------------------------------------------------------------------------------------------------------------------------------------------------------------------------------------------------------------------------------------------------------------------------------------------------------------------------------------------------------------------------------------------------------------------------------------------------------------------------------------------------------------------------------------------------------------------------------------------------------------------------------------------------------------------------------------------------------------------------------------------------------------------------------------------------------------------------------------------------------------------------------------------------------------------------------------------------------------------------------------------------------------------------------------------------------------------|
| United States National Library of Medicine and the National Institutes of Health Medical Database (Medline/PubMed)                                                                                                                                                                                                                                                                                   | <a href="http://www.ncbi.nlm.nih.gov/pubmed/">http://www.ncbi.nlm.nih.gov/pubmed/</a>                                                                                                                                                                                                                                                                                                                                                                                                                                                                                                                                                                                                                                                                                                                                                                                                                                                                                                                                                                                                                                             |
| Scientific Electronic Library Online (SciELO)                                                                                                                                                                                                                                                                                                                                                        | <a href="http://www.scielo.org/php/index.php?lang=en">http://www.scielo.org/php/index.php?lang=en</a>                                                                                                                                                                                                                                                                                                                                                                                                                                                                                                                                                                                                                                                                                                                                                                                                                                                                                                                                                                                                                             |
| Latin American and Caribbean Health Sciences Database (LILACS) – part of the Virtual Health Library (VHL)                                                                                                                                                                                                                                                                                            | <a href="http://lilacs.bvsalud.org/">http://lilacs.bvsalud.org/</a>                                                                                                                                                                                                                                                                                                                                                                                                                                                                                                                                                                                                                                                                                                                                                                                                                                                                                                                                                                                                                                                               |
| WHO Library database (WHOLIS)                                                                                                                                                                                                                                                                                                                                                                        | <a href="http://www.who.int/publications/en/">http://www.who.int/publications/en/</a>                                                                                                                                                                                                                                                                                                                                                                                                                                                                                                                                                                                                                                                                                                                                                                                                                                                                                                                                                                                                                                             |
| Pan American Health Organization (PAHO) Headquarters Library database                                                                                                                                                                                                                                                                                                                                | <a href="http://new.paho.org/">http://new.paho.org/</a>                                                                                                                                                                                                                                                                                                                                                                                                                                                                                                                                                                                                                                                                                                                                                                                                                                                                                                                                                                                                                                                                           |
| Instituto Nacional de Salud:<br>SIVIGILA<br>IQEN (Informe Quincenal Epidemiológico Nacional)<br>BES (Boletín Epidemiológico Semanal)                                                                                                                                                                                                                                                                 | <a href="http://www.ins.gov.co/">http://www.ins.gov.co/</a>                                                                                                                                                                                                                                                                                                                                                                                                                                                                                                                                                                                                                                                                                                                                                                                                                                                                                                                                                                                                                                                                       |
| University websites:<br>Universidad Industrial de Santander<br>Universidad de los Andes<br>Universidad Javeriana<br><br>Universidad del Rosario<br>Universidad de Antioquia<br>Universidad del Valle<br>Universidad Nacional de Colombia<br>Biblioteca Luis Ángel Arango<br>Hemeroteca Nacional: Carlos Lleras y Manuel del Socorro Rodríguez<br>Colciencias<br>Geographic Institute Agustín Codazzi | <a href="http://www.uis.edu.co/webUIS/es/index.jsp">http://www.uis.edu.co/webUIS/es/index.jsp</a> .<br><a href="http://www.uniandes.edu.co/">http://www.uniandes.edu.co/</a><br><a href="http://puj-portal.javeriana.edu.co/portal/page/portal/POR TAL_VERSION_2009_2010/es_inicio">http://puj-portal.javeriana.edu.co/portal/page/portal/POR TAL_VERSION_2009_2010/es_inicio</a><br><a href="http://www.urosario.edu.co/">http://www.urosario.edu.co/</a><br><a href="http://www.udea.edu.co/portal/page/portal/portal">http://www.udea.edu.co/portal/page/portal/portal</a><br><a href="http://www.univalle.edu.co/english/">http://www.univalle.edu.co/english/</a><br><a href="http://www.unal.edu.co/">http://www.unal.edu.co/</a><br><a href="http://www.banrepcultural.org/blaa">http://www.banrepcultural.org/blaa</a><br><a href="http://vlex.com.co/tags/hemeroteca-nacional-colombia-3619118">http://vlex.com.co/tags/hemeroteca-nacional-colombia-3619118</a><br><a href="http://www.colciencias.gov.co/">http://www.colciencias.gov.co/</a><br><a href="http://www.igac.gov.co/igac">http://www.igac.gov.co/igac</a> |
