# Supplementary material for: Epidemiological Trends of Dengue Disease in Colombia (2000-2011): A Systematic Review
Source: PubMed Central journal article supplement (PMC4366106; doi:10.1371/journal.pntd.0003499), 2015-03-19

**Figure S1. Departments of Colombia.**

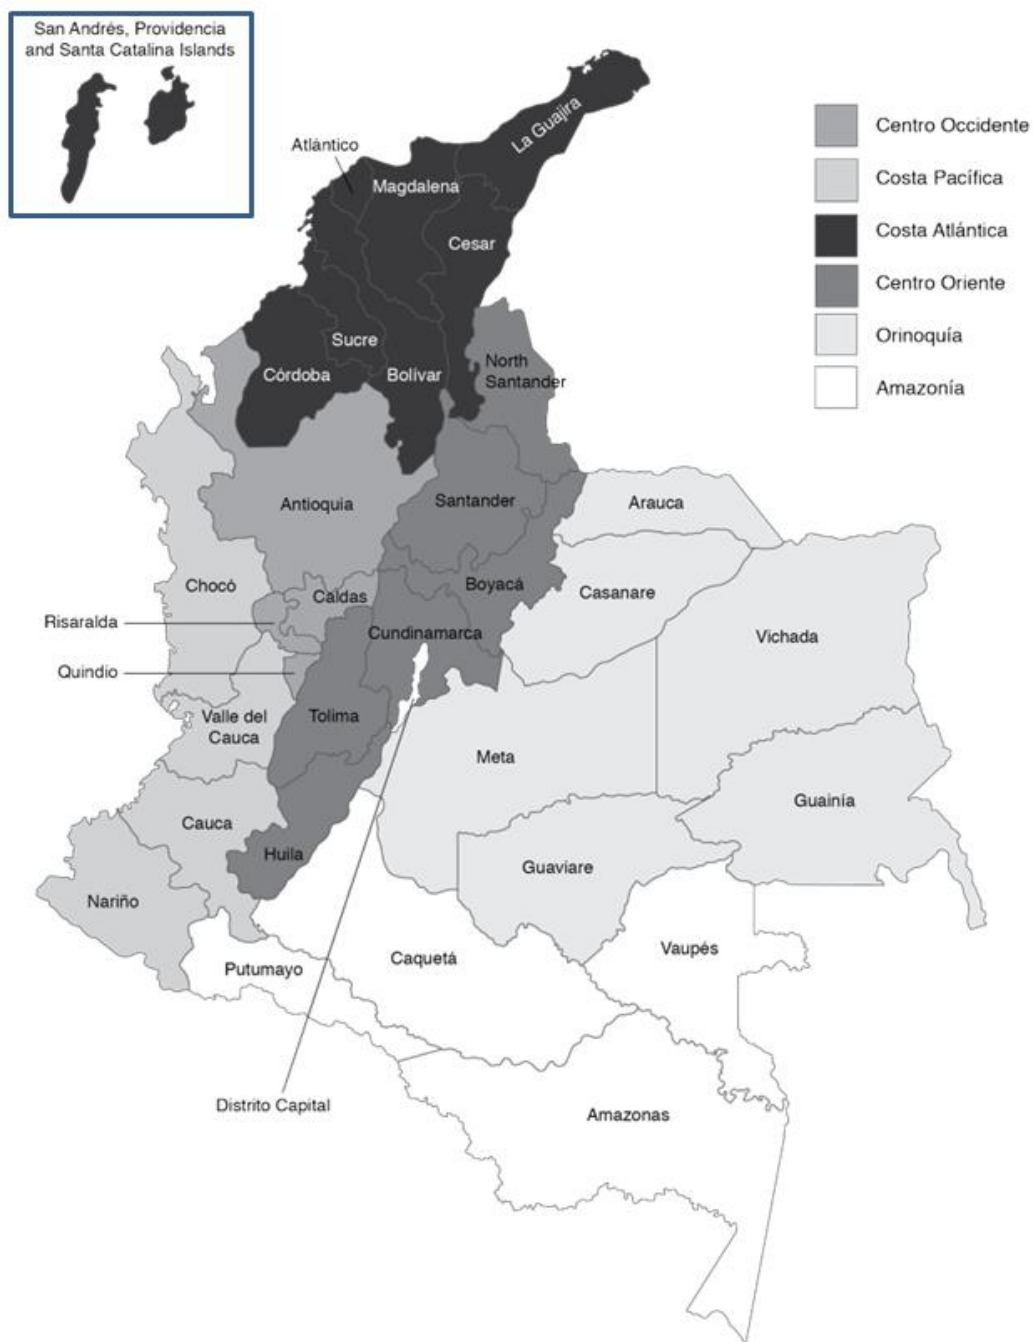

Supplement: pntd.0003499.s004.pdf [file pntd.0003499.s004.pdf]
